# Supplementary material for: Environmental DNA from Seawater Samples Correlate with Trawl Catches of Subarctic, Deepwater Fishes
Source: PubMed Central journal article supplement (PMC5112899; doi:10.1371/journal.pone.0165252), 2016-11-16
Supplement: pone.0165252.s001.pdf [file pone.0165252.s001.pdf]

Supporting Information for:

**Environmental DNA from seawater samples correlate with trawl catches of  
subarctic, deepwater fishes**

Philip Francis Thomsen<sup>1\*</sup>, Peter Rask Møller<sup>2</sup>, Eva Egelyng Sigsgaard<sup>2</sup>, Steen Wilhelm Knudsen<sup>2</sup>,  
Ole Ankjær Jørgensen<sup>3,4</sup>, Eske Willerslev<sup>1,5,6\*</sup>

<sup>1</sup> Centre for GeoGenetics, Natural History Museum of Denmark, University of Copenhagen, Denmark.

<sup>2</sup> Section for EvoGenomics, Natural History Museum of Denmark, University of Copenhagen, Denmark.

<sup>3</sup> Technical University of Denmark, National Institute of Aquatic Resources, Charlottenlund, Denmark.

<sup>4</sup> Greenland Institute of Natural Resources, Nuuk, Greenland.

<sup>5</sup> Department of Zoology, University of Cambridge, Cambridge, UK.

<sup>6</sup> Wellcome Trust Sanger Institute, Wellcome Genome Campus, Hinxton, Cambridge, UK.

\*) E-mail: pftthomsen@snm.ku.dk (PFT); ewillerslev@snm.ku.dk (EW)

**Figure A.** Histograms of input data before (above) and after (below) log transformation, showing left skewed data and approximation to normal distribution after transformation. Figure shows data for eDNA, biomass and number of individuals, respectively.

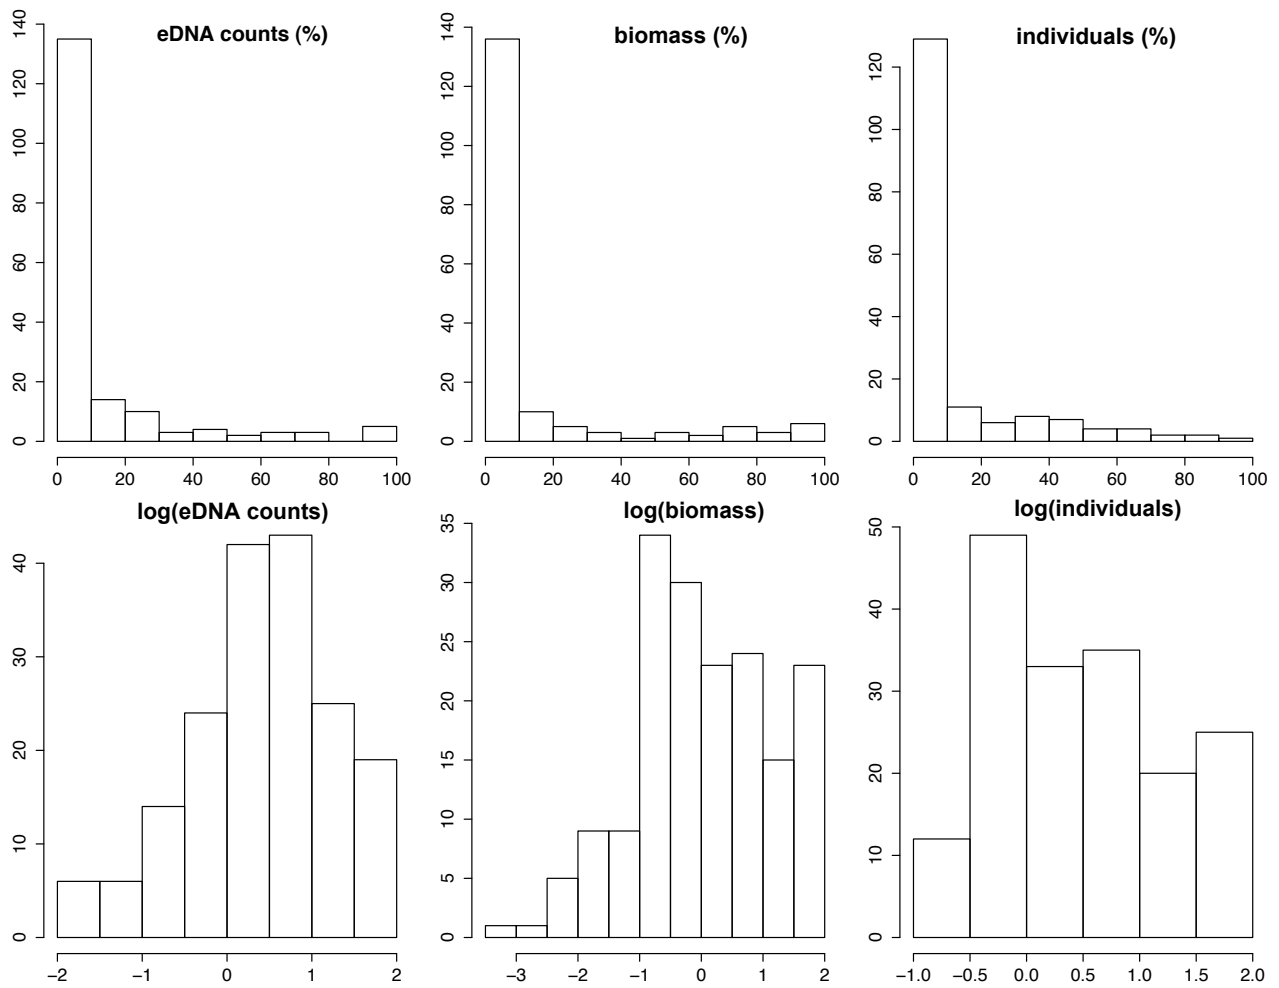

**Figure B.** Relationship between eDNA reads and biomass for each sample individually for all families. One sample (Davis\_14) has been removed since there are no corresponding points. This figure corresponds to Fig 6, but partitioned into samples.

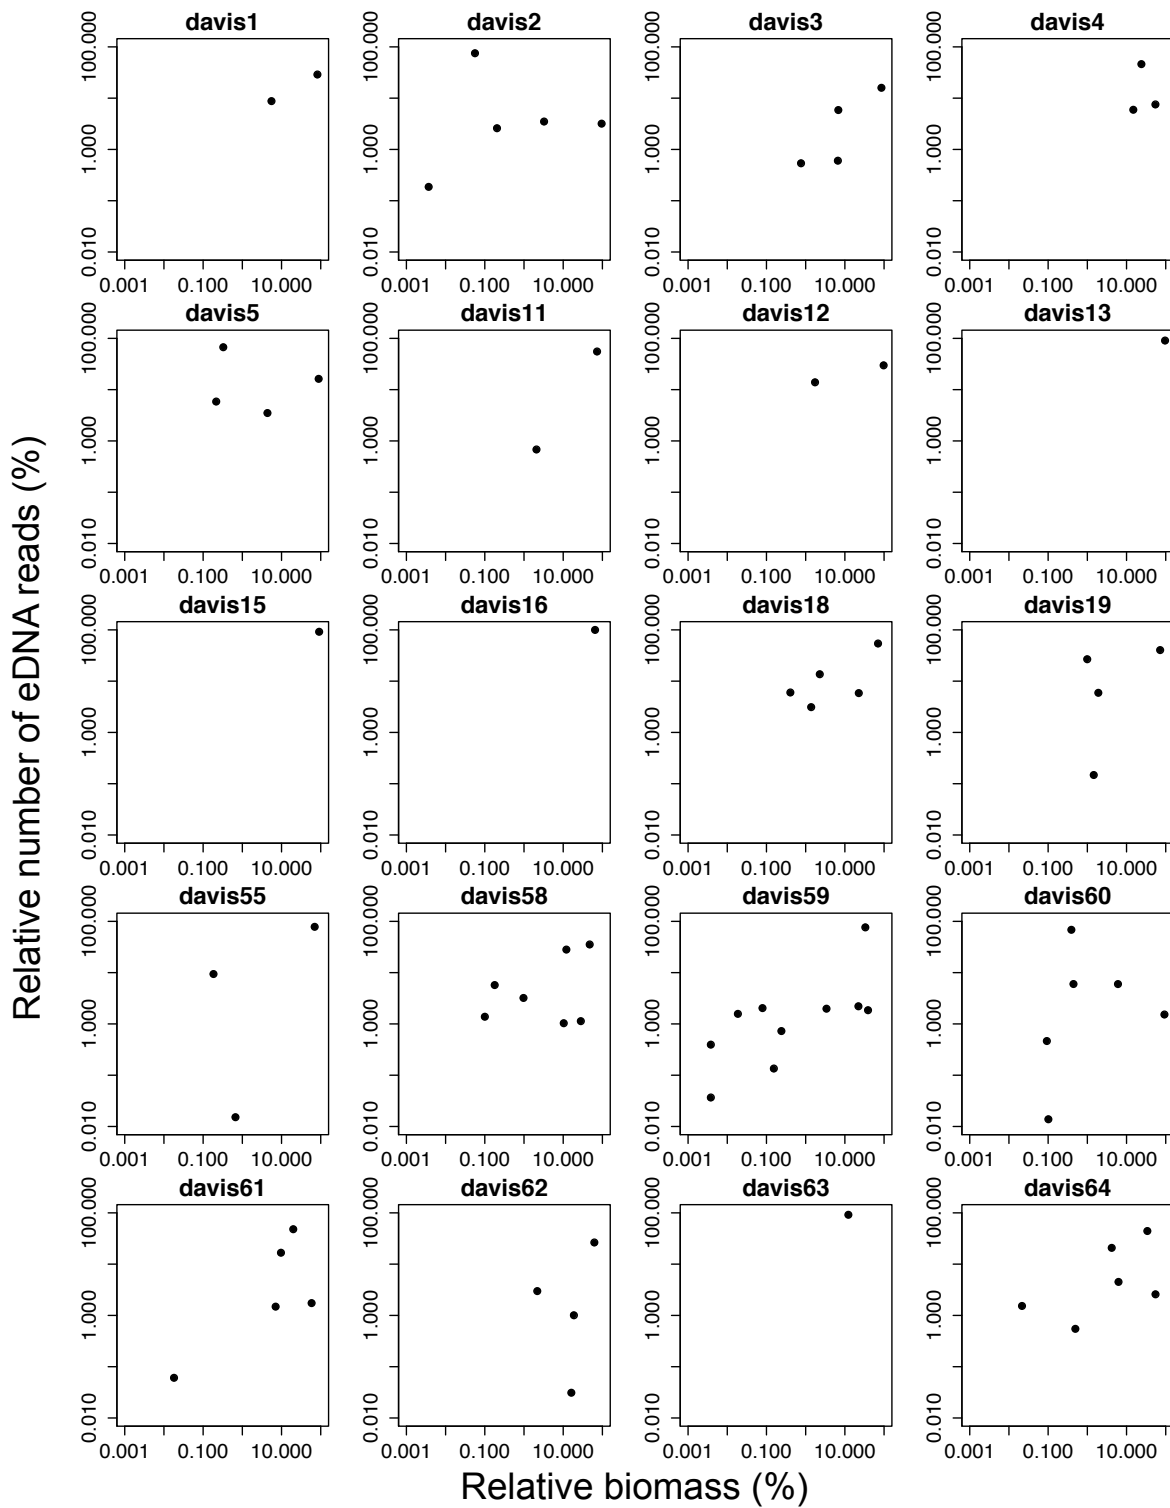

**Figure C.** Relationship between eDNA reads and number of individuals for each sample individually for all families. One sample (Davis\_14) has been removed since there are no corresponding points. This figure corresponds to Fig 6, but partitioned into samples.

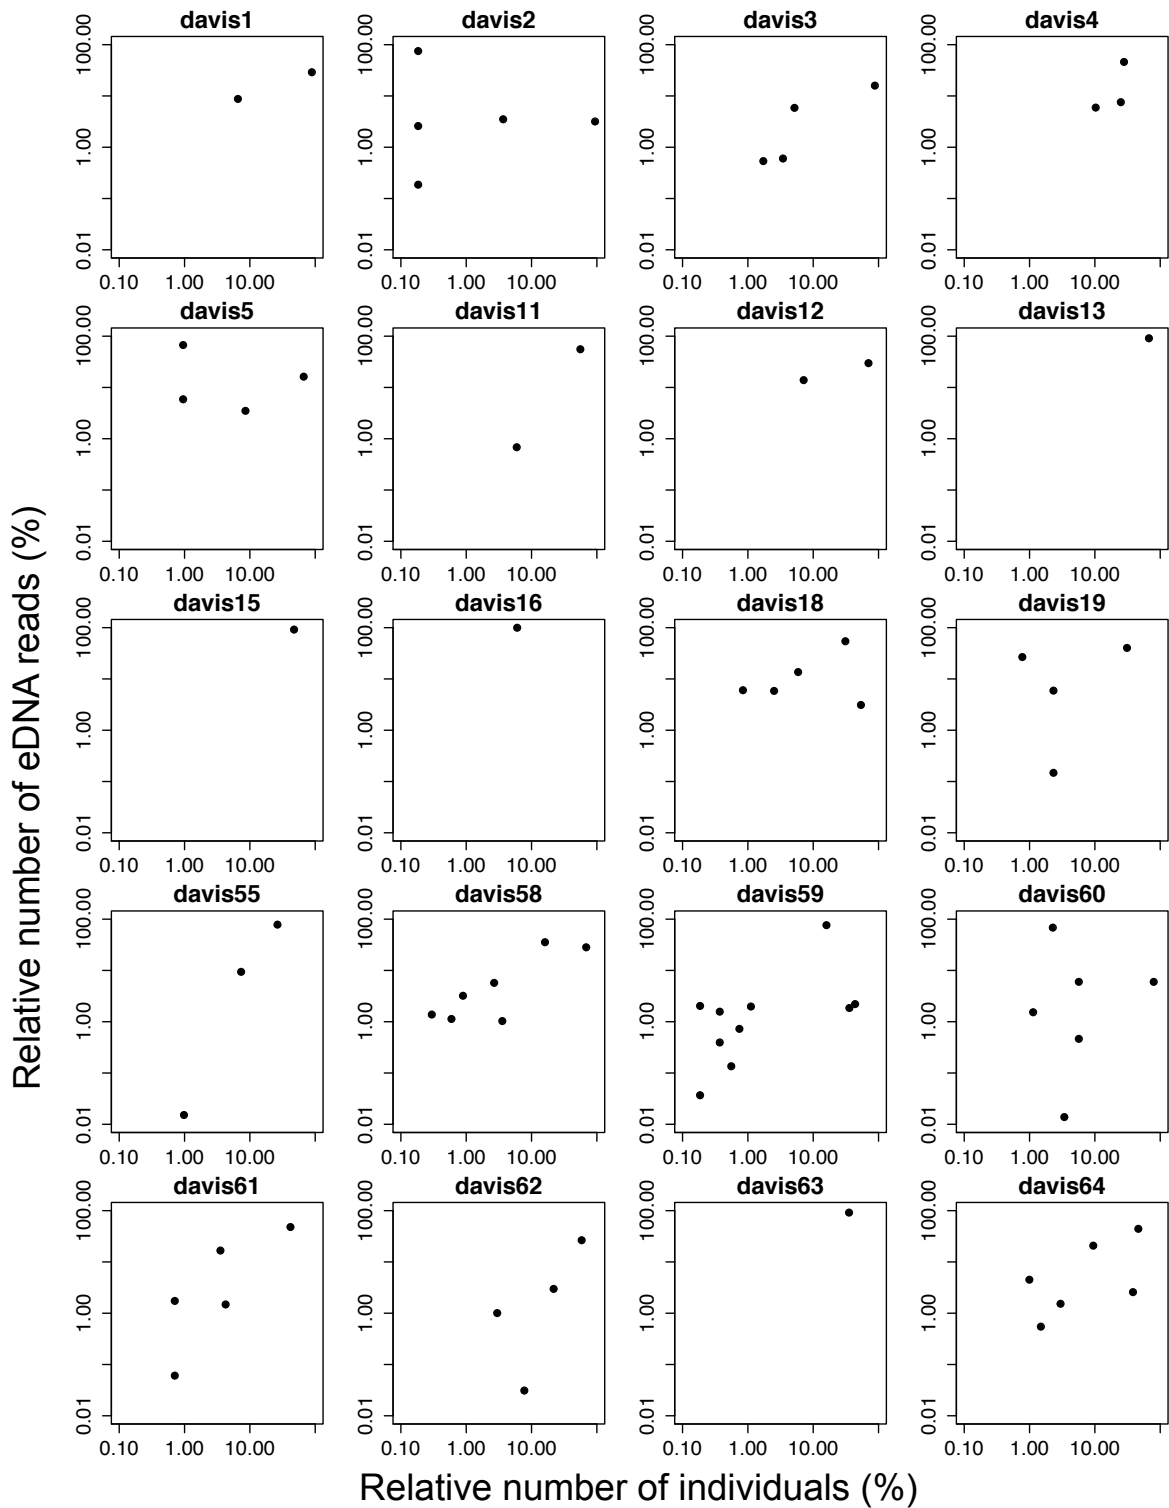

**Figure D.** Relationship between eDNA read frequencies and biomass (A) as well as number of individuals (B) at lowest possible taxonomic level. Results are shown for all fish taxa detected using both methods across all samples.

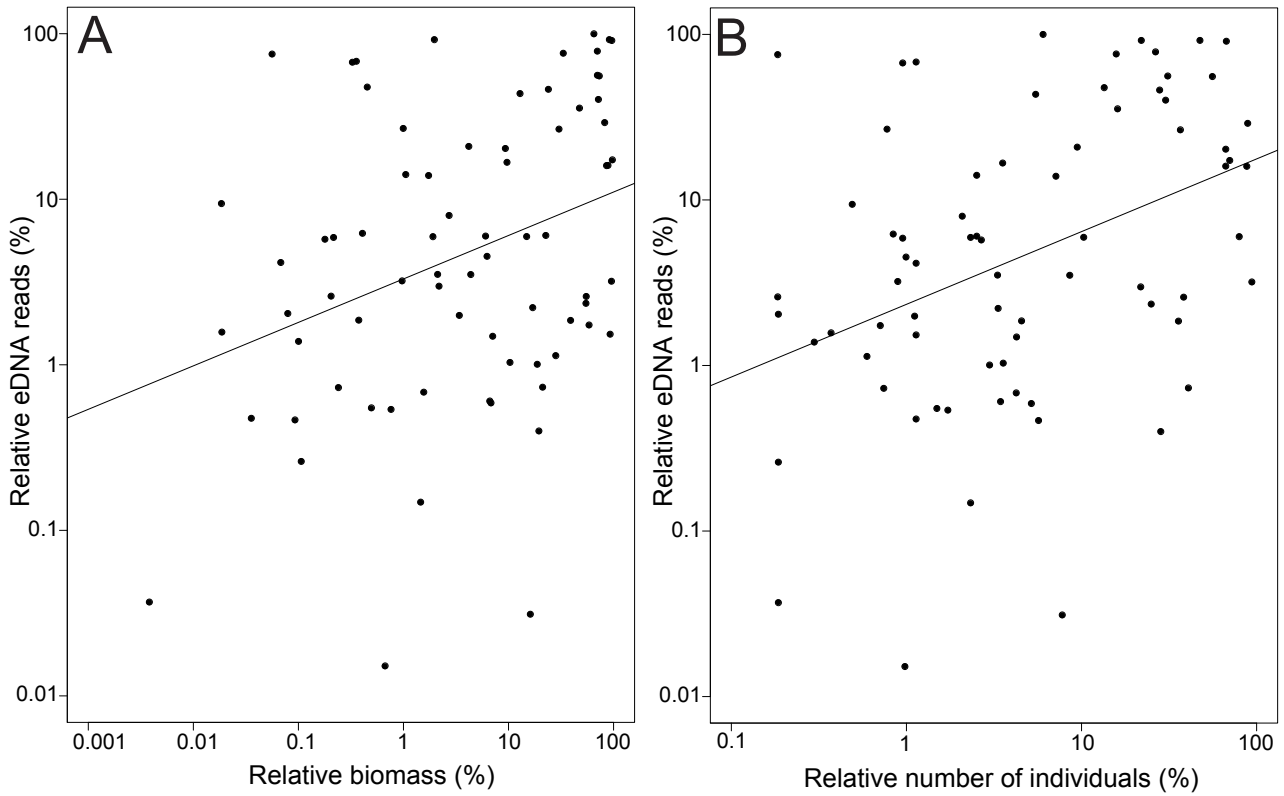

**Figure E.** Correlation of eDNA read abundance and tissue derived DNA concentrations added to the mock sample.

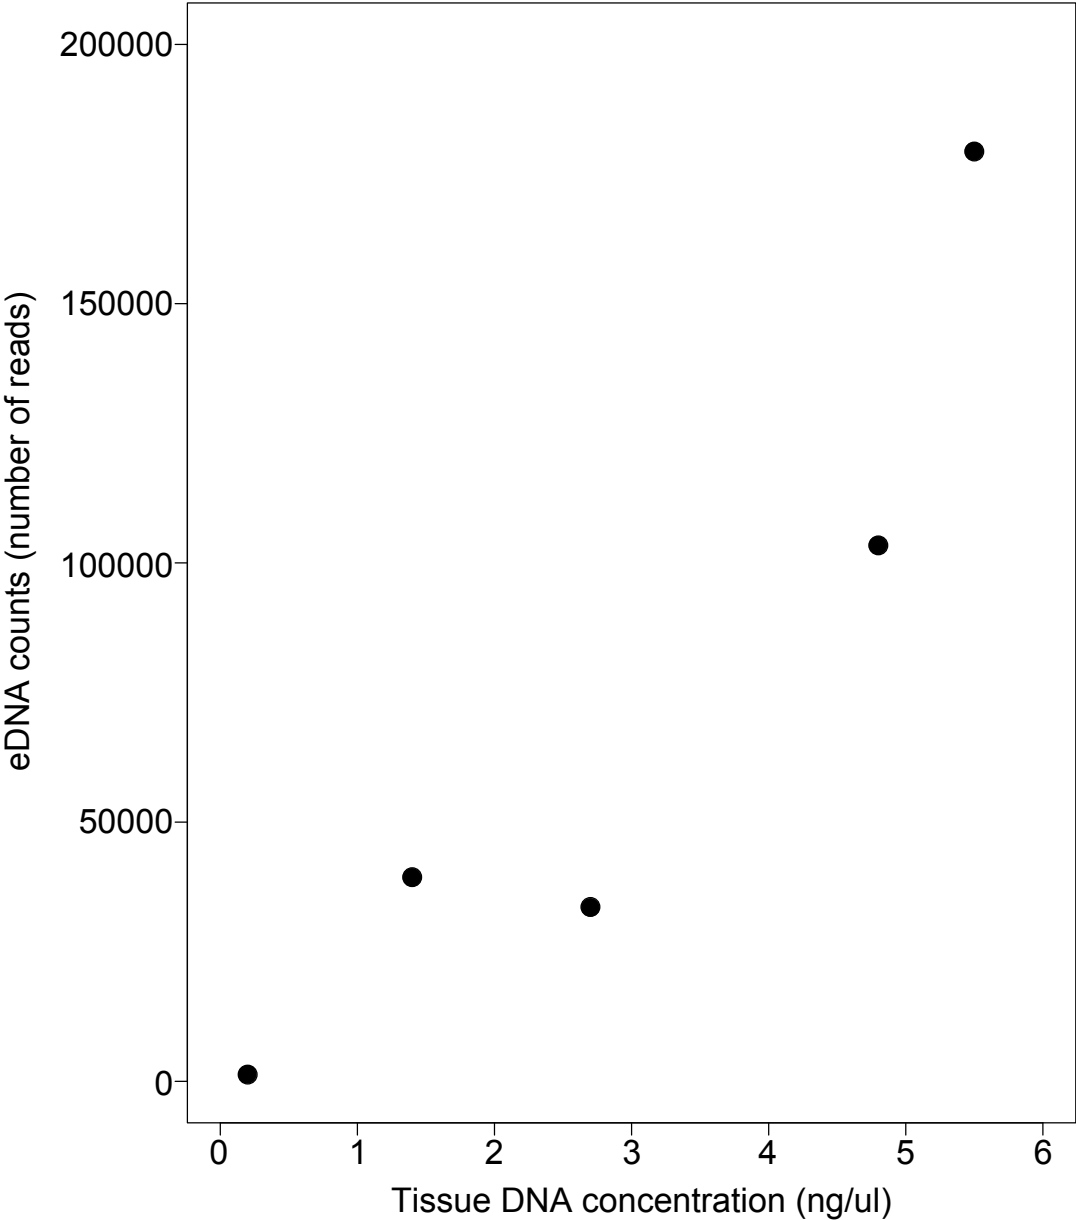

**Table A.** Information on sampling sites for this study. Table shows sample names, geographical position and depths.

| Sample   | Latitude, N | Longitude, W | Depth (m) |
|----------|-------------|--------------|-----------|
| Davis_1  | 65.2199     | -55.0316     | 585       |
| Davis_2  | 65.4722     | -55.3298     | 571.5     |
| Davis_3  | 65.7282     | -56.011      | 628       |
| Davis_4  | 65.498      | -56.7579     | 672.5     |
| Davis_5  | 65.2439     | -56.0266     | 781.5     |
| Davis_11 | 64.6832     | -55.7001     | 951       |
| Davis_12 | 64.7406     | -56.2167     | 858       |
| Davis_13 | 64.7218     | -55.0436     | 917.5     |
| Davis_14 | 64.753      | -57.2995     | 801.5     |
| Davis_15 | 64.4584     | -57.715      | 846.5     |
| Davis_16 | 64.403      | -57.4151     | 842       |
| Davis_18 | 64.4731     | -57.0501     | 826       |
| Davis_19 | 64.3894     | -56.9829     | 792       |
| Davis_55 | 64.2599     | -54.5698     | 822       |
| Davis_58 | 64.1498     | -54.1375     | 842.5     |
| Davis_59 | 64.1302     | -54.0197     | 735       |
| Davis_60 | 64.2237     | -54.0267     | 495.5     |
| Davis_61 | 63.7558     | -52.3561     | 206       |
| Davis_62 | 63.7273     | -52.3369     | 259.5     |
| Davis_63 | 63.6445     | -52.3538     | 188       |
| Davis_64 | 63.4969     | -52.3301     | 466.5     |

**Table B.** Mitochondrial 12S rRNA gene (partial) target sequences generated from tissue samples of Greenland fish species for the local reference database of the current study.

| Species                             | Specimen voucher | Sequence (5'-3')                                                    |
|-------------------------------------|------------------|---------------------------------------------------------------------|
| <i>Alepocephalus agassizii</i>      | ZMUC P2394941    | CCCCGAACCCCAACCTTTAAAAGTAAATAACAAAATTAACACCAAGGGGAGGCAAGTCGTAA      |
| <i>Anarhichas denticulatus</i>      | ZMUC P2394942    | CCCCAAGCCCAACCTAATTAACCTAAACCTAATAATCGCAAAGGGGAGGCAAGTCGTAA         |
| <i>Anarhichas minor</i>             | ZMUC P75870      | CCCCAAGCCCAACCTAATTAACCTAAACCTAATAATCGCAAAGGGGAGGCAAGTCGTAA         |
| <i>Antimora rostrata</i>            | ZMUC P375462     | CTCCAAATAAAACCTAAGAGTTACCTAAAACATTTTATTAATCAAGGAGAGGCAAGTCGTAA      |
| <i>Arctozenus risso</i>             | ZMUC P2394943    | CCCCAAGTCTAGTCCAACAAGTCCATAAAAACAACCTTTCTATAAAAGGGGAGGCAAGTCGTAA    |
| <i>Bathylagus euryops</i>           | ZMUC P191154     | CCCCAAGTCCACTCTCATAGATAATTAAGAAATCAACCGGACTAAGGGGAGGCAAGTCGTAA      |
| <i>Bathyraja spinicauda</i>         | ZMUC P2394944    | CCTCAATTTCAATCTTTTCCTTTTATAAATAGTCTTGTTTACAAGAGGAGGCAAGTCGTAA       |
| <i>Benthosema glaciale</i>          | ZMUC P2394945    | CCCCAAACCCCAACCCCTCACTAACATATATCACCCCTGGATAAAGGGGAGGCAAGTCGTAA      |
| <i>Boreogadus saida</i>             | ZMUC P375405     | CTCCAAATAAAACCTAGATATTACCTAAAATGCTTTTATAATAAAGGGGAGGCAAGTCGTAA      |
| <i>Borostomias antarcticus</i>      | ZMUC P2394946    | CCCCAAACCCACACCTTCCAGTAACATAAAAGACAACCGGACCAAGGGGAGGCAAGTCGTAA      |
| <i>Cauliodus sloani</i>             | ZMUC P2394947    | CCGCTAGTTCGCCATCTCTGTACCAACAAAATAGCAAGACAAAGCAGAGGCAAGTCGTAA        |
| <i>Centroscyllum fabricii</i>       | ZMUC P07197      | CCTCAACAAAACCTTTATTTTTTTTACATAAAAACCTTTATTTTTATAAAGAGGAGGCAAGTCGTAA |
| <i>Coryphaenoides guentheri</i>     | ZMUC P2394948    | CTCCGAGATATCTTTATTAATGCCTAATACGTAATAATTCAAGAAGGCGAGAAAAAGTCGTAA     |
| <i>Coryphaenoides rupestris</i>     | ZMUC P375899     | CTCCAAAACAAATTCCTTTGTACGTAACACATAAAAATAAAAACAAGGCGAGATAAGTCGTAA     |
| <i>Cottunculus thomsonii</i>        | ZMUC P814846     | CCCCAAAAGCCCCAGCCAGTTAATTAACCTAATAATCAAGAGGGGAGGCAAGTCGTAA          |
| <i>Cyclopterus lumpus</i>           | ZMUC P821740     | CCCCAAAACCACACCCCGTTAATTAACCTAATAACCAACAAGGGGAGGCAAGTCGTAA          |
| <i>Cyclothone microdon</i>          | ZMUC P2014787    | CCCCAAAATCTCTCTCATAATTCCTAAAACCGGAACTTCAGAAGGGGAGGCAAGTCGTAA        |
| <i>Gaidropsarus argentatus</i>      | ZMUC P2394949    | CTCCAAATACTCATAATTATTTACCTAAAATATTTAACTAACAAGGAGAGGCAAGTCGTAA       |
| <i>Gaidropsarus ensis</i>           | ZMUC P375255     | CTCCAAATACTCATAATTATTTACCTAAAATATTTAACTAACAAGGAGAGGCAAGTCGTAA       |
| <i>Hippoglossoides platessoides</i> | ZMUC P855805     | CCCCAAGCATCTGAATAAACCTAATTAAGCCAAACAGACCGCGAAGGGGAGGAAAGTCGTAA      |
| <i>Holthyrnia anomala</i>           | ZMUC P2394950    | CCCCGCACCCCAACCTAAAGTAAATAACAAAATTAACCTACCAAGGGGAGGCAAGTCGTAA       |
| <i>Lampanyctus intricatus</i>       | ZMUC P2393471    | CCCCAAGTCTACCTACCATAACCTATAGCCTTATATGGATAAAGGGGAGGCAAGTCGTAA        |
| <i>Lampanyctus crocodilus</i>       | ZMUC P2394951    | CCCCAAGTCCCACCTACCATAACCTATAGCCTTATATGGATAAAGGGGAGGCAAGTCGTAA       |
| <i>Lepidion eques</i>               | ZMUC P375406     | CTCCAAATAAAACCTAAAAGTTACCTAAAACATTTTACTCAAGGAGAGGCAAGTCGTAA         |
| <i>Macrourus berglax</i>            | ZMUC P375333     | CCCCGAAACAACCTCTTTATTCCTAATAATTTAAATAAAAACAAGGTGAGATAAGTCGTAA       |
| <i>Magnisudis atlantica</i>         | ZMUC P2393498    | CCCCAAATATAACCCACCTAGTTAATAAAAAACCTTTTAAACGAAGGGGAGGCAAGTCGTAA      |
| <i>Malacosteus niger</i>            | ZMUC P2394952    | CCCCGAGTTCATCGTGCCCGCTAATTAAGAAGTGAGTCAACAAGGGGAGGCAAGTCGTAA        |
| <i>Mallotus villosus</i>            | ZMUC P191156     | CTCCAAGTCTACTAAATTTGGTCTTAACAAGATCACCGAACAAAGGGGAGGCAAGTCGTAA       |
| <i>Melanogrammus aeglefinus</i>     | ZMUC P375933     | CTCCAAATAAACCTAGATATTACCTAAAATGCTTTTATAATAAAGGGGAGGCAAGTCGTAA       |
| <i>Molva dypterygia</i>             | ZMUC P2394846    | CTCCAAATAAACCTGAATATTACCTAAAATGTTTTATATAATAAAGGGGAGGCAAGTCGTAA      |
| <i>Myctophum punctatum</i>          | ZMUC P2393486    | CCCCGAGTCTCTACAGCCTTAACCTATAGCACAAAACCTGACAAAAGAGGAGGAAAGTCGTAA     |
| <i>Nezumia bairdii</i>              | ZMUC P2394953    | CTCCGAGATATCTTTATTAATGCCTAATACGTAATAATTCAAGAAGGCGAGAAAAAGTCGTAA     |
| <i>Paraliparis copei</i>            | ZMUC P821757     | CTCCAAATAACGCAAAATTAACCTAAAACCTAATAAACAAGGAGAGGCAAGTCGTAA           |
| <i>Rajella bigelowi</i>             | ZMUC P08737      | CCTCAACCTATGCTACTCTATTCTATAAATAAATTTTATCAAGAGGAGGCAAGTCGTAA         |
| <i>Rajella fyllae</i>               | ZMUC P08634      | CCTCAACCTATGTTACTCTATTTTATAAATAAATTTTATCAAGAGGAGGCAAGTCGTAA         |
| <i>Amblyaja radiata</i>             | ZMUC P08636      | CCTCAACCTAAGCTACTCTATTTTATAAATAAATTTTATCAAGAGGAGGCAAGTCGTAA         |
| <i>Reinhardtius hippoglossoides</i> | ZMUC P855804     | CCCCAAGCCCCGTAACCTAATAAATAAACCACCAACCCCGAAGGGGAGGAAAGTCGTAA         |
| <i>Scopelosaurus lepidus</i>        | ZMUC P2394954    | CCCCCAGCACCCGCGCTGACCGTTATTAACCTGATTATGTAACAAGGGGAGGCAAGTCGTAA      |
| <i>Sebastes mentella</i>            | ZMUC P791418     | CCCCAAGCCTATCACTTTAAATAATTAACCAACCAAAATCGCGGAGGGGAGGCAAGTCGTAA      |
| <i>Sebastes norvegicus</i>          | ZMUC P2394847    | CCCCAAGCCTATCACTTTAAATAATTAACCAACCAAAATCGCGGAGGGGAGGCAAGTCGTAA      |
| <i>Sigmops bathyphilus</i>          | ZMUC P2394955    | CCCCGAGCCCAACAACATCACTAAAATAAATAAATAAAGGGGAGGCAAGTCGTAA             |
| <i>Somniosus microcephalus</i>      | ZMUC P2394956    | CCTCAACAAAACCTTACTTTTTATAAAAAAATTTTACTAAGAGGAGGCAAGTCGTAA           |
| <i>Stomias boa</i>                  | ZMUC P2014774    | CCCCAAGTTCACCTCTAAGTAAGTAAAAGAACTATAGAATAAGGGGAGGCAAGTCGTAA         |
| <i>Synphobranchus kaupii</i>        | ZMUC P321354     | CCTCGAAATAAATTAACCAATATATAAACACTAAAATACAAGAAAGAGGAGCAAGTCGTAA       |
| <i>Trachyrincus murrayi</i>         | ZMUC P375245     | CTCCGAATGAACCTTTGATGATACTAATATGTTTTACCAATTAAGGAGAGGCAAGTCGTAA       |



**Table C.** Greenlandic fish species. Table shows all fish species recorded in Greenland within the 31 families found in this study, along with information on general abundance (expectance of finding the species) (based on Møller *et al.* 2010, [10]) and coverage in local 12S rRNA gene database. This information is used for adjusting the taxonomic assignments given to eDNA reads (Table 1).

| Family          | Species                                           | Local database | Commonness      |
|-----------------|---------------------------------------------------|----------------|-----------------|
| Alepocephalidae | <i>Alepocephalus agassizii</i> Goode & Bean, 1883 | x              | common          |
| Alepocephalidae | <i>Alepocephalus bairdii</i> Goode & Bean, 1879   | x              | common          |
| Alepocephalidae | <i>Bajacalifornia megalops</i> (Lütken, 1898)     | x              | rather common   |
| Alepocephalidae | <i>Bathylaco nigricans</i> Goode & Bean, 1896     | x              | very rare       |
| Alepocephalidae | <i>Bathytroctes microlepis</i> Günther, 1878      | x              | very rare       |
| Alepocephalidae | <i>Einara edentula</i> (Alcock, 1892)             | -              | very rare       |
| Alepocephalidae | <i>Photostylus pycnopterus</i> Beebe, 1933        | -              | very rare       |
| Alepocephalidae | <i>Rouleina attrita</i> (Vaillant, 1888)          | -              | common          |
| Alepocephalidae | <i>Rouleina maderensis</i> Maul, 1948             | -              | common          |
| Alepocephalidae | <i>Xenedermichthys copei</i> (Gill, 1884)         | x              | common          |
| Ammodytidae     | <i>Ammodytes dubius</i> Reinhardt, 1837           | x              | common          |
| Ammodytidae     | <i>Ammodytes marinus</i> Raitt, 1934              | x              | common          |
| Anarhichadidae  | <i>Anarhichas denticulatus</i> Krøyer, 1845       | x              | very common     |
| Anarhichadidae  | <i>Anarhichas lupus</i> Linnaeus, 1758            | x              | very common     |
| Anarhichadidae  | <i>Anarhichas minor</i> Olafsen & Poulsen, 1772   | x              | very common     |
| Argentinidae    | <i>Argentina silus</i> (Ascanius, 1775)           | x              | common          |
| Arhynchobatidae | <i>Bathyraja spinicauda</i> (Jensen, 1914)        | x              | rather common   |
| Bathylagidae    | <i>Bathylagus euryops</i> Goode & Bean, 1896      | x              | common          |
| Bathylagidae    | <i>Melanolagus bericoides</i> (Borodin, 1929)     | -              | rare            |
| Clupeidae       | <i>Clupea harengus</i> Linnaeus, 1758             | x              | relatively rare |
| Cyclopteridae   | <i>Cyclopterus lumpus</i> Linnaeus, 1758          | x              | common          |
| Cyclopteridae   | <i>Cyclopteropsis mcalpini</i> (Fowler, 1914)     | -              | very rare       |
| Cyclopteridae   | <i>Eumicrotremus derjugini</i> Popov, 1926        | -              | very rare       |
| Cyclopteridae   | <i>Eumicrotremus spinosus</i> (Fabricius, 1776)   | -              | very common     |
| Etmopteridae    | <i>Centroscyllium fabricii</i> (Reinhardt, 1825)  | x              | common          |
| Etmopteridae    | <i>Etmopterus princeps</i> Collett, 1904          | x              | very rare       |
| Gadidae         | <i>Arctogadus glacialis</i> (Peters, 1874)        | x              | common          |
| Gadidae         | <i>Boreogadus saida</i> (Lepechin, 1774)          | x              | very common     |
| Gadidae         | <i>Gadus macrocephalus</i> Tilesius, 1810         | x              | very common     |
| Gadidae         | <i>Gadus morhua</i> Linnaeus, 1758                | x              | very common     |
| Gadidae         | <i>Melanogrammus aeglefinus</i> (Linnaeus, 1758)  | x              | rare            |
| Gadidae         | <i>Merlangius merlangus</i> (Linnaeus, 1758)      | x              | rare            |
| Gadidae         | <i>Micromesistius poutassou</i> (Risso, 1826)     | x              | rare            |

|                |                                                        |   |               |
|----------------|--------------------------------------------------------|---|---------------|
| Gadidae        | <i>Pollachius virens</i> (Linnaeus, 1758)              | x | rare          |
| Gadidae        | <i>Trisopterus esmarkii</i> (Nilsson, 1855)            | x | rare          |
| Gaidropsaridae | <i>Gaidropsaurus argentatus</i> (Reinhardt, 1837)      | x | common        |
| Gaidropsaridae | <i>Gaidropsaurus ensis</i> (Reinhardt, 1837)           | x | common        |
| Gonostomatidae | <i>Cyclothone braueri</i> Jespersen & Tåning, 1926     | - | rather rare   |
| Gonostomatidae | <i>Cyclothone microdon</i> (Günther, 1878)             | x | common        |
| Gonostomatidae | <i>Sigmops bathyphilus</i> (Vaillant, 1888)            | x | rather common |
| Gonostomatidae | <i>Sigmops elongatus</i> (Günther, 1878)               | - | very rare     |
| Liparidae      | <i>Careproctus micropus</i> (Günther, 1887)            | - | very rare     |
| Liparidae      | <i>Careproctus reinhardti</i> (Krøyer, 1862)           | - | very common   |
| Liparidae      | <i>Careproctus kidoi</i> Knudsen & Møller, 2008        | - | rare          |
| Liparidae      | <i>Liparis fabricii</i> Krøyer, 1847                   | - | very common   |
| Liparidae      | <i>Liparis gibbus</i> Bean, 1881                       | - | common        |
| Liparidae      | <i>Liparis tunicatus</i> Reinhardt, 1837               | - | common        |
| Liparidae      | <i>Paraliparis bathybius</i> (Collett, 1879)           | - | common        |
| Liparidae      | <i>Paraliparis copei</i> Goode & Bean, 1896            | x | common        |
| Liparidae      | <i>Paraliparis garmani</i> Burke, 1912                 | - | common        |
| Liparidae      | <i>Psednos christinae</i> Andriashev, 1992             | - | very rare     |
| Liparidae      | <i>Psednos gelatinosus</i> Chernova, 2001              | - | very rare     |
| Liparidae      | <i>Psednos groenlandicus</i> Chernova, 2001            | - | very rare     |
| Liparidae      | <i>Psednos melanocephalus</i> Chernova & Stein, 2002   | - | very rare     |
| Liparidae      | <i>Psednos micruroides</i> Chernova, 2001              | - | very rare     |
| Liparidae      | <i>Rhodichthys regina</i> Collett, 1879                | - | common        |
| Lotidae        | <i>Brosme brosme</i> (Ascanius, 1772)                  | - | rare          |
| Lotidae        | <i>Molva dypterygia</i> (Pennant, 1784)                | x | rare          |
| Lotidae        | <i>Molva molva</i> (Linnaeus, 1758)                    | x | very rare     |
| Macrouridae    | <i>Coryphaenoides armatus</i> Hector, 1875             | - | very rare     |
| Macrouridae    | <i>Coryphaenoides brevibarbis</i> (Goode & Bean, 1896) | - | common        |
| Macrouridae    | <i>Coryphaenoides carapinus</i> Goode & Bean, 1883     | - | very rare     |
| Macrouridae    | <i>Coryphaenoides guentheri</i> (Vaillant, 1888)       | x | common        |
| Macrouridae    | <i>Coryphaenoides longifilis</i> Günther, 1877         | - | very rare     |
| Macrouridae    | <i>Coryphaenoides mediterranea</i> (Giglioli, 1893)    | - | very rare     |
| Macrouridae    | <i>Coryphaenoides rupestris</i> Gunnerus, 1765         | x | very common   |
| Macrouridae    | <i>Macrourus berglax</i> Lapépede, 1801                | x | very common   |
| Macrouridae    | <i>Nezumia aequalis</i> (Günther, 1878)                | - | very rare     |
| Macrouridae    | <i>Nezumia bairdii</i> (Goode & Bean, 1877)            | x | common        |
| Macrouridae    | <i>Trachyrincus murrayi</i> Günther, 1887              | x | common        |
| Moridae        | <i>Antimora rostrata</i> (Günter, 1878)                | x | very common   |
| Moridae        | <i>Guttigadus latifrons</i> (Holt & Byrne, 1908)       | - | very rare     |
| Moridae        | <i>Halargyreus johnsonii</i> Günther, 1862             | x | very rare     |

|                |                                                               |   |                 |
|----------------|---------------------------------------------------------------|---|-----------------|
| Moridae        | <i>Lepidion eques</i> (Günther, 1887)                         | x | very rare       |
| Myctophidae    | <i>Benthoosema glaciale</i> (Reinhardt, 1837)                 | x | very common     |
| Myctophidae    | <i>Lampadena speculigera</i> Goode & Bean, 1896               | - | common          |
| Myctophidae    | <i>Lampanyctus crocodilus</i> (Risso, 1810)                   | X | rare            |
| Myctophidae    | <i>Lampanyctus intricarius</i> Tåning, 1928                   | X | rare            |
| Myctophidae    | <i>Lampanyctus macdonaldi</i> (Goode & Bean, 1896)            | X | very common     |
| Myctophidae    | <i>Myctophum punctatum</i> Rafinesque, 1810                   | x | very common     |
| Myctophidae    | <i>Notoscopelus kroeyeri</i> (Malm, 1861)                     | x | very common     |
| Myctophidae    | <i>Protomyctophum arcticum</i> (Lütken, 1892)                 | x | very common     |
| Notacanthidae  | <i>Notacanthus chemnitzii</i> Block, 1788                     | x | common          |
| Notacanthidae  | <i>Polyacanthonotus rissoanus</i> (De Filippi & Verany, 1859) | x | common          |
| Notosudidae    | <i>Scopelosaurus lepidus</i> (Krefft & Maul, 1955)            | - | common          |
| Oneirodidae    | <i>Chaenophryne draco</i> Beebe, 1932                         | - | very rare       |
| Oneirodidae    | <i>Chaenophryne longiceps</i> Regan, 1925                     | - | very rare       |
| Oneirodidae    | <i>Danaphryne nigrifilis</i> (Regan & Trewavas, 1932)         | - | very rare       |
| Oneirodidae    | <i>Dolopichthys longicornis</i> Parr, 1927                    | - | very rare       |
| Oneirodidae    | <i>Lophodolos acanthognathus</i> Regan, 1925                  | - | very rare       |
| Oneirodidae    | <i>Oneirodes eschrichtii</i> Lütken, 1871                     | - | rare            |
| Oneirodidae    | <i>Oneirodes macrosteus</i> Pietsch, 1974                     | - | very rare       |
| Oneirodidae    | <i>Phyllorhinichthys balushkini</i> Pietsch, 2004             | - | very rare       |
| Oneirodidae    | <i>Phyllorhinichthys micractis</i> Pietsch, 1969              | - | very rare       |
| Oneirodidae    | <i>Spiniphryne gladisfenae</i> (Beebe, 1932)                  | - | very rare       |
| Osmeridae      | <i>Mallotus villosus</i> (Müller, 1776)                       | x | very common     |
| Paralepididae  | <i>Arctozenus risso</i> (Bonaparte, 1840)                     | x | very common     |
| Paralepididae  | <i>Magnisudis atlantica</i> (Krøyer, 1868)                    | x | relatively rare |
| Paralepididae  | <i>Paralepis coregonoides</i> Risso, 1820                     | - | very common     |
| Platyroctidae  | <i>Barbantus curvifrons</i> (Roule and Angel, 1931)           | - | very rare       |
| Platyroctidae  | <i>Holtbyrnia anomala</i> Krefft, 1980                        | x | common          |
| Platyroctidae  | <i>Holtbyrnia macrops</i> Maul, 1957                          | - | common          |
| Platyroctidae  | <i>Maulisia maui</i> Parr, 1960                               | x | rather rare     |
| Platyroctidae  | <i>Maulisia microlepis</i> Sazonov & Golovan, 1976            | - | rather common   |
| Platyroctidae  | <i>Normichthys operosus</i> Parr, 1951                        | x | rather rare     |
| Platyroctidae  | <i>Platyroctes apus</i> Günther, 1878                         | x | very rare       |
| Platyroctidae  | <i>Sagamichthys schnakenbecki</i> (Krefft, 1953)              | - | very rare       |
| Platyroctidae  | <i>Searsia koefoedi</i> Parr, 1937                            | - | rather common   |
| Pleuronectidae | <i>Glyptocephalus cynoglossus</i> (Linnaeus, 1758)            | - | rather common   |
| Pleuronectidae | <i>Hippoglossoides platessoides</i> (Fabricius, 1780)         | x | very common     |
| Pleuronectidae | <i>Hippoglossus hippoglossus</i> (Linnaeus, 1758)             | x | common          |
| Pleuronectidae | <i>Microstomus kitt</i> (Walbaum, 1792)                       | x | rare            |
| Pleuronectidae | <i>Pleuronectes platessa</i> Linnaeus, 1758                   | x | rare            |

|                  |                                                                            |   |               |
|------------------|----------------------------------------------------------------------------|---|---------------|
| Pleuronectidae   | <i>Reinhardtius hippoglossoides</i> (Walbaum, 1792)                        | x | very common   |
| Psychrolutidae   | <i>Cottunculus microps</i> Collett, 1875                                   | - | very rare     |
| Psychrolutidae   | <i>Cottunculus thomsonii</i> (Günther, 1882)                               | x | common        |
| Psychrolutidae   | <i>Psychrolutes subspinosus</i> (Jensen, 1902)                             | - | rare          |
| Rajidae          | <i>Amblyraja hyperborea</i> (Collett, 1879)                                | x | very common   |
| Rajidae          | <i>Amblyraja jenseni</i> (Bigelow & Schroeder, 1950)                       | - | very rare     |
| Rajidae          | <i>Amblyraja radiata</i> (Donovan, 1808)                                   | x | very common   |
| Rajidae          | <i>Malacoraja spinacidermis</i> (Barnard, 1923)                            | - | rare          |
| Rajidae          | <i>Rajella bathyphila</i> (Holt & Byrne, 1908)                             | - | rather rare   |
| Rajidae          | <i>Rajella bigelowi</i> (Stehmann, 1978)                                   | x | rather rare   |
| Rajidae          | <i>Rajella fyllae</i> (Lütken, 1888)                                       | x | common        |
| Rajidae          | <i>Rajella lintea</i> (Fries, 1838)                                        | - | very rare     |
| Sebastidae       | <i>Helicolenus dactylopterus</i> (Delaroche, 1809)                         | x | very rare     |
| Sebastidae       | <i>Sebastes fasciatus</i> Storer, 1856                                     | - | very rare     |
| Sebastidae       | <i>Sebastes norvegicus</i> (Ascanius, 1772)                                | x | very common   |
| Sebastidae       | <i>Sebastes mentella</i> Travin, 1951                                      | x | very common   |
| Sebastidae       | <i>Sebastes viviparus</i> Krøyer, 1845                                     | - | very rare     |
| Serrivomeridae   | <i>Serrivomer beanii</i> Gill & Ryder, 1883                                | x | common        |
| Somniosidae      | <i>Centroscymnus coelolepis</i> Barbosa du Bocage & de Brito Capello, 1864 | - | very rare     |
| Somniosidae      | <i>Somniosus microcephalus</i> (Bloch & Schneider, 1801)                   | x | common        |
| Stomiidae        | <i>Borostomias antarcticus</i> (Lönnberg, 1905)                            | x | common        |
| Stomiidae        | <i>Chauliodus sloani</i> Bloch & Schneider, 1801                           | x | common        |
| Stomiidae        | <i>Malacosteus niger</i> Ayres, 1848                                       | x | rather common |
| Stomiidae        | <i>Rhadinesthes decimus</i> (Zugmayer, 1911)                               | - | rare          |
| Stomiidae        | <i>Stomias boa</i> Risso, 1810                                             | x | common        |
| Stomiidae        | <i>Trigonolampa miriceps</i> Regan & Trewavas, 1930                        | - | very rare     |
| Synphobranchidae | <i>Histiobranchus bathybius</i> (Günther, 1877)                            | - | very rare     |
| Synphobranchidae | <i>Synphobranchus kaupii</i> Johnson, 1862                                 | x | very common   |
